# Supplementary material for: Herbivores rescue diversity in warming tundra by modulating trait-dependent species losses and gains
Source: PubMed Central journal article supplement (PMC5583392; doi:10.1038/s41467-017-00554-z), 2017-09-04
Supplement: 41467_2017_554_MOESM1_ESM.pdf [file 41467_2017_554_MOESM1_ESM.pdf]

Type of file: pdf

Title of file for HTML: Supplementary Information

Description: Supplementary Figures, Supplementary Tables, and Supplementary References

-----

Type of file: pdf

Title of file for HTML: Peer Review File

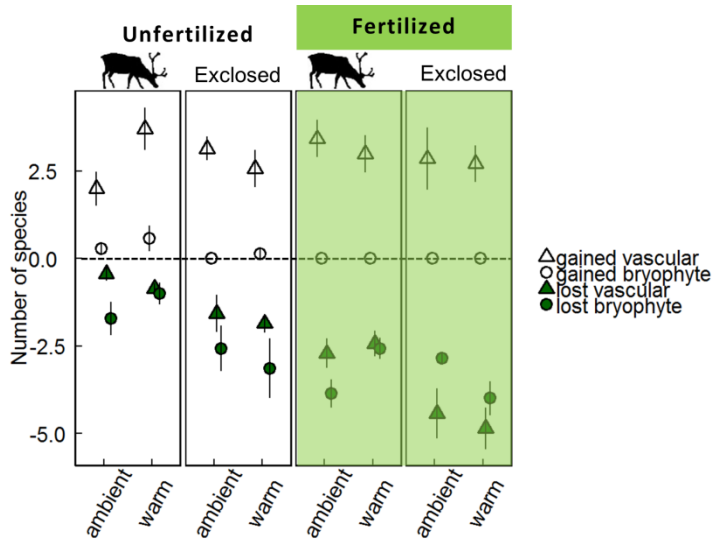

**Supplementary Figure 1. Number of lost and gained vascular plants and bryophytes.** Change in number of species (means and SE,  $n=7$  for each point) under warming, herbivore exclusion and fertilization treatments between 2009 and 2014. Vascular plant and bryophyte richness at the start of the experiment was  $17.9 \pm 0.46$  and  $3.7 \pm 0.19$  species in  $25 \times 50 \text{ cm}^2$  quadrats (mean $\pm$ SE,  $n=56$ ), respectively.

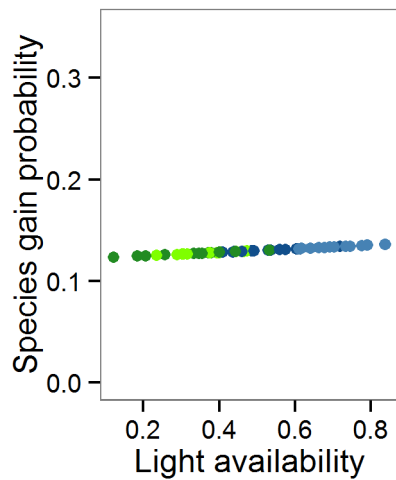

**Supplementary Figure 2. Impact of light availability on species gain probability.** Relationship between light availability (measured as proportion of ambient PAR penetrating through vegetation) and species gain probability in fertilization and herbivore exclusion treatments. Fertilized plots are shown in green, unfertilized in blue. Herbivore exclusions are indicated with dark color, grazed plots in light color.

**Supplementary Table 1. Impacts of warming, grazing and fertilization on species richness.**

Results of ANOVA of effects of treatments and their interactions on change in species richness of all plants (vascular plants + bryophytes), vascular plants and bryophytes between 2009 and 2014. Each treatment combination has 1 numerator and 48 denominator degrees of freedom. P-values <0.05 are considered significant and indicated in bold.

|                         | All plants |                  | Vascular plants |                  | Bryophytes |                  |
|-------------------------|------------|------------------|-----------------|------------------|------------|------------------|
|                         | <i>F</i>   | <i>P</i>         | <i>F</i>        | <i>P</i>         | <i>F</i>   | <i>P</i>         |
| Warming (W)             | 0.03       | 0.870            | 0.02            | 0.886            | 0.24       | 0.625            |
| Herbivore exclusion (E) | 18.74      | <b>&lt;0.001</b> | 12.95           | <b>&lt;0.001</b> | 8.14       | <b>0.006</b>     |
| Fertilization (F)       | 33.11      | <b>&lt;0.001</b> | 21.22           | <b>&lt;0.001</b> | 16.27      | <b>&lt;0.001</b> |
| W × E                   | 6.08       | <b>0.017</b>     | 1.68            | 0.567            | 7.06       | <b>0.012</b>     |
| W × F                   | 0.36       | 0.545            | 0.33            | 0.201            | 0.09       | 0.769            |
| E × F                   | 0.03       | 0.870            | 2.07            | 0.156            | 5.12       | <b>0.028</b>     |
| W × E × F               | 0.08       | 0.786            | 0.75            | 0.392            | 0.47       | 0.494            |

**Supplementary Table 2. Impacts of warming, grazing and fertilization on species gains and losses.** Results of ANOVA of effects of treatments and their interactions on numbers of lost and gained species of all plants, vascular plants and bryophytes between 2009 and 2014. Number of gained bryophytes were virtually zero and thus could not be modeled. Each treatment combination has 1 numerator and 48 denominator degrees of freedom. Transformed response variables are indicated in footnotes. P-values <0.05 are considered significant and indicated in bold and marginally significant values (P<0.1) are indicated in bold italics.

|                         | Lost plants |                  | Gained plants <sup>1</sup> |              | Lost vascular plants <sup>2</sup> |                  | Gained vascular plants |          | Lost bryophytes |              |
|-------------------------|-------------|------------------|----------------------------|--------------|-----------------------------------|------------------|------------------------|----------|-----------------|--------------|
|                         | <i>F</i>    | <i>P</i>         | <i>F</i>                   | <i>P</i>     | <i>F</i>                          | <i>P</i>         | <i>F</i>               | <i>P</i> | <i>F</i>        | <i>P</i>     |
| Warming (W)             | 0.07        | 0.789            | 0.40                       | 0.530        | 0.16                              | 0.694            | 0.13                   | 0.726    | 0.04            | 0.840        |
| Herbivore exclusion (E) | 21.02       | <b>&lt;0.001</b> | 0.80                       | 0.375        | 18.75                             | <b>&lt;0.001</b> | 0.28                   | 0.599    | 5.92            | <b>0.019</b> |
| Fertilization (F)       | 47.29       | <b>&lt;0.001</b> | 0.08                       | 0.777        | 35.89                             | <b>&lt;0.001</b> | 0.13                   | 0.726    | 11.88           | <b>0.001</b> |
| W × E                   | 4.09        | <b>0.049</b>     | 1.31                       | 0.258        | 0.16                              | 0.691            | 1.53                   | 0.223    | 6.95            | <b>0.011</b> |
| W × F                   | 0.07        | 0.789            | 1.12                       | 0.295        | 0.01                              | 0.940            | 1.12                   | 0.295    | 0.00            | 1.000        |
| E × F                   | 0.07        | 0.789            | 0.14                       | 0.714        | 5.89                              | <b>0.019</b>     | 0.28                   | 0.599    | 3.33            | <b>0.074</b> |
| W × E × F               | 0.89        | 0.350            | 3.02                       | <b>0.089</b> | 0.32                              | 0.573            | 2.53                   | 0.119    | 0.66            | 0.421        |

Transformations: <sup>1</sup>square root, <sup>2</sup>log10

**Supplementary Table 3. Results of logistic regression analysis of tested factors' effects on probabilities of species losses.** Summary of logistic regression models predicting effects of species' initial abundance (2009), light availability (proportion of PAR penetrating vegetation) and functional traits on probabilities of species' loss under indicated treatment combinations. Models including functional traits were simplified (see Methods). Number of replicates slightly varies due to missing trait values for some species.

|                                                      | Estimate | z-value | <i>P</i> |
|------------------------------------------------------|----------|---------|----------|
| <b>Initial abundance (n=1000)</b>                    |          |         |          |
| Intercept                                            | -1.486   | -9.235  | <0.001   |
| Abundance 2009                                       | -0.076   | -4.238  | <0.001   |
| <b>Proportion PAR (n=1000)</b>                       |          |         |          |
| Intercept                                            | -0.170   | -0.632  | 0.528    |
| Proportion PAR                                       | -3.773   | -6.226  | <0.001   |
| <b>Proportion PAR and initial abundance (n=1000)</b> |          |         |          |
| Intercept                                            | -0.042   | -0.135  | 0.893    |
| PAR                                                  | -2.746   | -3.779  | <0.001   |
| Abundance 2009                                       | 0.021    | 0.901   | 0.368    |
| PAR × Abundance 2009                                 | -0.258   | -3.026  | 0.002    |

**Height (n=1000)**

|                    |        |        |        |
|--------------------|--------|--------|--------|
| Intercept          | 1.084  | 2.875  | 0.004  |
| Warming (W)        | -0.132 | -0.616 | 0.538  |
| Exclosure (E)      | 0.432  | 0.706  | 0.481  |
| Fertilization (F)  | -0.849 | -1.390 | 0.165  |
| Abundance 2009     | -0.031 | -1.979 | 0.048  |
| Height             | -0.110 | -5.117 | <0.001 |
| E × Height         | -0.048 | -1.209 | 0.227  |
| F × Height         | 0.021  | 0.559  | 0.576  |
| E × F              | -1.955 | -2.064 | 0.039  |
| E × Abundance 2009 | -0.183 | -2.815 | 0.005  |
| F × Abundance 2009 | -0.301 | -2.915 | 0.004  |
| E × F × Height     | 0.117  | 1.911  | 0.056  |

**SLA (n=999)**

|                    |       |        |        |
|--------------------|-------|--------|--------|
| Intercept          | 1.041 | 2.473  | 0.013  |
| Warming (W)        | 0.110 | -0.541 | 0.589  |
| Exclosure (E)      | 0.240 | -0.874 | 0.382  |
| Fertilization (F)  | 0.679 | -2.093 | 0.036  |
| Abundance 2009     | 0.032 | -2.116 | 0.034  |
| SLA                | 0.080 | -4.514 | <0.001 |
| E × Abundance 2009 | 0.140 | -2.708 | 0.007  |
| F × Abundance 2009 | 0.267 | -2.749 | 0.006  |

**log(C:P) (n=955)**

|                    |         |        |        |
|--------------------|---------|--------|--------|
| Intercept          | -14.367 | -5.160 | <0.001 |
| Warming (W)        | -0.210  | -0.951 | 0.342  |
| Exclosure (E)      | -0.091  | -0.304 | 0.761  |
| Fertilization (F)  | 8.648   | 1.820  | 0.069  |
| Abundance 2009     | -0.030  | -1.994 | 0.045  |
| log (CP)           | 2.407   | 4.940  | <0.001 |
| E × Abundance 2009 | -0.142  | -2.667 | 0.008  |
| F × Abundance 2009 | -0.255  | -2.346 | 0.019  |
| F × log(CP)        | -1.659  | -1.989 | 0.047  |

**C:N (n=997)**

|                    |        |        |        |
|--------------------|--------|--------|--------|
| Intercept          | -3.335 | -5.459 | <0.001 |
| Warming (W)        | 1.464  | 1.969  | 0.049  |
| Exclosure (E)      | -0.252 | -0.913 | 0.361  |
| Fertilization (F)  | 1.263  | 1.490  | 0.136  |
| Abundance 2009     | -0.039 | -2.520 | 0.012  |
| CN                 | 0.124  | 4.743  | <0.001 |
| E × Abundance 2009 | -0.141 | -2.681 | 0.007  |
| F × Abundance 2009 | -0.260 | -2.645 | 0.008  |
| W × CN             | -0.068 | -2.135 | 0.033  |
| E × CN             | 0.063  | 1.753  | 0.080  |
| F × CN             | -0.088 | -2.408 | 0.016  |

**Condensed tannins (n=978)**

|                   |        |        |        |
|-------------------|--------|--------|--------|
| Intercept         | -0.829 | -4.034 | <0.001 |
| Abundance 2009    | -0.018 | -1.393 | 0.164  |
| Warming (W)       | -0.186 | -0.906 | 0.365  |
| Exclosure (E)     | -0.242 | -0.884 | 0.377  |
| Fertilization (F) | -0.505 | -1.547 | 0.122  |

|                                     |        |        |        |
|-------------------------------------|--------|--------|--------|
| Tannins                             | 0.006  | 1.931  | 0.053  |
| E × Abundance 2009                  | -0.123 | -2.459 | 0.014  |
| F × Abundance 2009                  | -0.274 | -2.811 | 0.005  |
| <b>log(Total phenolics (n=953))</b> |        |        |        |
| Intercept                           | -1.829 | -3.484 | <0.001 |
| Abundance 2009                      | -0.015 | -1.284 | 0.199  |
| Exclosure (E)                       | -0.117 | -0.414 | 0.679  |
| Fertilization (F)                   | -0.735 | -2.038 | 0.042  |
| Warming (W)                         | -0.283 | -1.307 | 0.191  |
| Phenols                             | 0.296  | 2.181  | 0.029  |
| E × Abundance 2009                  | -0.125 | -2.551 | 0.011  |
| F × Abundance 2009                  | -0.269 | -2.462 | 0.014  |

---

**Supplementary Table 4. Results of logistic regression analysis of tested factors' effects on probabilities of species gains.** Summary of simplified logistic regression models predicting effects of functional traits on probabilities of species gains under indicated treatment combinations.

|                                           | <b>Estimate</b> | <b>z-value</b> | <b>P</b> |
|-------------------------------------------|-----------------|----------------|----------|
| <b>Community biomass in 2014 (n=1257)</b> |                 |                |          |
| Intercept                                 | -0.709          | -0.375         | 0.708    |
| log(Community biomass)                    | -0.169          | -0.632         | 0.527    |
| <b>Height (n=1257)</b>                    |                 |                |          |
| Intercept                                 | -2.241          | -6.661         | <0.001   |
| Warming (W)                               | 0.275           | 0.579          | 0.563    |
| Exclosure (E)                             | 0.544           | 1.184          | 0.236    |
| Fertilization (F)                         | 0.434           | 0.937          | 0.349    |
| Height                                    | 0.008           | 0.938          | 0.349    |
| W × E                                     | -0.866          | -1.302         | 0.193    |
| W × F                                     | -0.271          | -0.400         | 0.689    |
| E × F                                     | -1.558          | -2.237         | 0.025    |
| W × Height                                | -0.006          | -0.479         | 0.632    |
| E × Height                                | -0.009          | -0.685         | 0.494    |
| F × Height                                | -0.007          | -0.572         | 0.568    |
| W × E × F                                 | 2.393           | 2.463          | 0.014    |
| W × E × Height                            | 0.020           | 1.104          | 0.270    |
| W × F × Height                            | 0.001           | 0.050          | 0.960    |
| E × F × Height                            | 0.023           | 1.239          | 0.216    |
| W × E × F × Height                        | -0.045          | -1.649         | 0.099    |
| <b>SLA (n=1257)</b>                       |                 |                |          |
| Intercept                                 | -2.613          | -4.724         | <0.001   |
| Warming (W)                               | 0.119           | 0.348          | 0.728    |
| Exclosure (E)                             | -1.117          | -1.401         | 0.161    |
| Fertilization (F)                         | -0.642          | -0.809         | 0.419    |
| SLA                                       | 0.030           | 1.188          | 0.235    |
| W × E                                     | -0.307          | -0.644         | 0.520    |
| W × F                                     | -0.273          | -0.559         | 0.576    |
| E × F                                     | 0.940           | 0.815          | 0.415    |
| E × SLA                                   | 0.066           | 1.943          | 0.052    |
| F × SLA                                   | 0.043           | 1.239          | 0.216    |
| W × E × F                                 | 1.240           | 1.796          | 0.073    |
| E × F × SLA                               | -0.087          | -1.775         | 0.076    |
| <b>C:N (n=1203)</b>                       |                 |                |          |
| Intercept                                 | -3.007          | -4.137         | <0.001   |
| Warming (W)                               | 0.183           | 0.525          | 0.600    |
| Exclosure (E)                             | 1.708           | 1.836          | 0.066    |
| Fertilization (F)                         | 1.701           | 1.795          | 0.073    |

|                          |        |        |        |
|--------------------------|--------|--------|--------|
| CN                       | 0.045  | 1.441  | 0.150  |
| W × E                    | -0.405 | -0.853 | 0.394  |
| W × F                    | -0.299 | -0.610 | 0.542  |
| E × F                    | -3.086 | -2.354 | 0.019  |
| E × CN                   | -0.063 | -1.513 | 0.130  |
| F × CN                   | -0.067 | -1.561 | 0.119  |
| W × E × F                | 1.316  | 1.916  | 0.055  |
| E × F × CN               | 0.100  | 1.697  | 0.090  |
| <b>Condensed tannins</b> |        |        |        |
| <b>(n=995)</b>           |        |        |        |
| Intercept                | -1.825 | -6.316 | <0.001 |
| Warming (W)              | 0.626  | 1.536  | 0.125  |
| Exclosure (E)            | 0.938  | 2.401  | 0.016  |
| Fertilization (F)        | 0.658  | 1.644  | 0.100  |
| Tannins                  | -0.005 | -0.569 | 0.569  |
| W × E                    | -1.100 | -1.980 | 0.048  |
| W × F                    | -1.094 | -1.883 | 0.060  |
| E × F                    | -1.591 | -2.776 | 0.006  |
| W × Tannins              | -0.040 | -1.702 | 0.089  |
| E × Tannins              | -0.055 | -1.934 | 0.053  |
| F × Tannins              | -0.025 | -1.518 | 0.129  |
| W × E × F                | 2.293  | 2.849  | 0.004  |
| W × E × Tannins          | 0.073  | 1.925  | 0.054  |
| W × F × Tannins          | 0.066  | 2.297  | 0.022  |
| E × F × Tannins          | 0.062  | 1.760  | 0.079  |
| W × E × F × Tannins      | -0.100 | -2.184 | 0.029  |
| <b>Total phenolics</b>   |        |        |        |
| <b>(n=964)</b>           |        |        |        |
| Intercept                | -1.678 | -7.663 | <0.001 |
| Warming (W)              | 0.227  | 1.229  | 0.219  |
| Exclosure (E)            | 0.055  | 0.297  | 0.766  |
| Fertilization (F)        | 0.082  | 0.445  | 0.657  |
| Phenolics                | -0.005 | -2.308 | 0.021  |

---



**Supplementary Table 5. Species and groups of taxa with their functional traits.** Functional traits for the dominant species (underlined) of each group of taxa were used as traits for the whole group.

| Species or group taxon                                                                 | Height (cm) | SLA (mm <sup>2</sup> /mg) | C:N  | C:P   | Condensed tannins (mg/g) | Total phenolics (mg/g) | Data source                             |
|----------------------------------------------------------------------------------------|-------------|---------------------------|------|-------|--------------------------|------------------------|-----------------------------------------|
| <i>Achillea millefolium</i>                                                            | 43.1        | 10.2                      | 15   | 193.6 | NA                       | NA                     | TRY, Garnier <i>et al.</i> <sup>1</sup> |
| <u><i>Alchemilla sp.</i></u> + <i>alpina</i>                                           | 23.8        | 21.3                      | 23.8 | 317.2 | 3.1                      | 142                    | own collection 2014                     |
| <u><i>Antennaria dioica</i></u> + <i>alpina</i>                                        | 10.5        | 14.3                      | 30.8 | 358.9 | 1.0                      | 54.7                   | own collection 2014                     |
| <u><i>Anthoxanthum odoratum</i></u> +<br><i>Poa alpigena</i> + <i>Hierochloë hirta</i> | 24.6        | 27.4                      | 17.4 | 317.5 | 1.0                      | 10                     | own collection 2014                     |
| <u><i>Astragalus alpinus</i></u> + <i>frigidus</i>                                     | 9.8         | 16.2                      | 10.9 | 169.7 | 1.0                      | 19.8                   | own collection 2014                     |
| <i>Bistorta vivipara</i>                                                               | 15.3        | 14.5                      | 17.9 | 237.3 | 93.2                     | 90.5                   | own collection 2014                     |
| <i>Bothrychium lunaria</i>                                                             | 5           | 17.7                      | NA   | NA    | NA                       | NA                     | TRY, Fitter <i>et al.</i> <sup>2</sup>  |
| <i>Calamagrostis lapponica</i>                                                         | 91.6        | 12.2                      | 20.6 | NA    | NA                       | NA                     | own collection 2010                     |
| <u><i>Carex bigelowii</i></u> +<br><i>vaginata</i> + <i>norwegica</i>                  | 14.4        | 18.4                      | 18.4 | 309   | 1.0                      | 18.6                   | own collection 2014                     |
| <i>Cerastium alpinum</i>                                                               | 8.8         | 20.2                      | 15.2 | NA    | 10.                      | NA                     | own collection 2010                     |
| <i>Coeloglossum viride</i>                                                             | NA          | NA                        | NA   | NA    | NA                       | NA                     |                                         |
| <i>Deschampsia cespitosa</i>                                                           | 82.6        | 11.6                      | 26.8 | 409.6 | 1.0                      | 10.7                   | own collection 2014                     |
| <u><i>Deschampsia flexuosa</i></u> +<br><i>Festuca ovina</i>                           | 40.1        | 13.6                      | 31   | 341.2 | 1.0                      | 13.6                   | own collection 2014                     |
| <u><i>Equisetum pratense</i></u> +<br><i>squirpoides</i>                               | 21.7        | 16.5                      | 23.6 | 425.7 | 1.0                      | 19.0                   | own collection 2014                     |
| <i>Erigeron uniflorum</i>                                                              | 10.7        | 23.9                      | 19.6 | NA    | NA                       | NA                     | TRY, Pierce <i>et al.</i> <sup>3</sup>  |
| <i>Euphrasia frigida</i>                                                               | 8.1         | 14.6                      | 12   | 147   | 2.6                      | 31.9                   | own collection 2014                     |
| <i>Gentiana nivalis</i>                                                                | 8.9         | 28.5                      | 23.5 | 432.9 | 1.0                      | 25.9                   | own collection 2014                     |
| <i>Gerastium sylvaticum</i>                                                            | 43.6        | 23.8                      | 18.9 | 211.9 | 1.0                      | 165                    | own collection 2014                     |
| <i>Gnaphalium supinum</i>                                                              | 4.6         | 35.8                      | 18.4 | 250.6 | 1.0                      | 47.2                   | own collection 2014                     |
| <u><i>Hieracium alpinum</i></u><br>+ <i>Leontodon autumnalis</i>                       | 19.1        | 20.8                      | 22.1 | 253   | 1.0                      | 33.1                   | own collection 2014                     |
| <i>Linnea borealis</i>                                                                 | 6.3         | 15.4                      | 44.6 | 350.9 | 1.0                      | 23.1                   | own collection 2014                     |
| <u><i>Luzula multiflora</i></u> + <i>spicata</i>                                       | 15.9        | 23.9                      | 18.8 | 185.4 | 1.0                      | 25.9                   | own collection 2014                     |
| <i>Nardus stricta</i>                                                                  | 17          | NA                        | NA   | NA    | NA                       | NA                     | own collection 2014                     |
| <i>Oxyria digyna</i>                                                                   | 17.4        | 19.6                      | 16   | 216.3 | 14.9                     | 28.6                   | own collection 2014                     |
| <u><i>Poa alpina</i></u> + <i>Phleum alpinum</i>                                       | 25.2        | 21                        | 26.2 | 279.1 | 1.0                      | 17.1                   | own collection 2014                     |
| <i>Potentilla cranzii</i>                                                              | 16.2        | 13                        | 21.7 | 314   | 5.8                      | 86.6                   | own collection 2014                     |
| <i>Pyrola minor</i>                                                                    | 11.5        | 15.4                      | 30.4 | 362.4 | 60.8                     | 99.3                   | own collection 2014                     |
| <i>Ranunculus acris</i>                                                                | 27.2        | 22.5                      | 19.6 | 232   | 1.0                      | 27.9                   | own collection 2014                     |
| <i>Rumex lapponum</i>                                                                  | 43.5        | 23.6                      | 18.4 | 301.8 | 56.8                     | 55.3                   | own collection 2014                     |
| <u><i>Salix hastata</i></u> + <i>phylicipholia</i>                                     | 13.4        | 13.2                      | 27.7 | NA    | NA                       | NA                     | own collection 2010                     |
| <i>Salix herbarea</i>                                                                  | 3.7         | 15.8                      | 23.8 | 360.2 | 125.1                    | 128                    | own collection 2014                     |
| <i>Salix reticulata</i>                                                                | 3.5         | 10.5                      | 22.3 | 379.2 | 105.0                    | 83.8                   | own collection 2014                     |
| <i>Saussurea alpina</i>                                                                | 24.8        | 23.6                      | 22.3 | 395   | 1.0                      | 22.8                   | own collection 2014                     |

|                                 |      |      |      |       |      |      |                                    |
|---------------------------------|------|------|------|-------|------|------|------------------------------------|
| <i>Selaginella selaginoides</i> | 3.5  | NA   | 24.8 | 363.5 | 1.0  | 17.2 | own collection 2014                |
| <i>Sibbaldia procumbens</i>     | 4.4  | 17.9 | 17.9 | 195.6 | 43.5 | 188  | own collection 2014                |
| <i>Solidago virgaurea</i>       | 31.2 | 31.8 | 16.8 | 107.7 | 1.0  | 20.4 | own collection 2014                |
| <i>Taraxacum</i> spp.           | 25.9 | 27.5 | 15.8 | 250.1 | 1.0  | 29.6 | own collection 2014                |
| <i>Thalictrum alpinum</i>       | 6.4  | 15.4 | 22.4 | 417.5 | 1.0  | 21.5 | own collection 2014                |
| <i>Trientalis europea</i>       | 6.8  | 30.8 | 31.9 | 292.4 | 41.1 | 55.6 | own collection 2014                |
| <i>Trisetum spicatum</i>        | 15.3 | 12.8 | 4.7  | NA    | NA   | NA   | TRY, Spasojevic et al <sup>4</sup> |
| <i>Trollius europeus</i>        | 66.5 | 25.1 | 22.7 | 222.7 | 1.0  | 32.6 | own collection 2014                |
| <i>Vaccinium myrtillus</i>      | 9.4  | 20.5 | 30.3 | 416.9 | 75.4 | 103  | own collection 2014                |
| <i>Vaccinium uliginosum</i>     | 12.4 | 15   | 25.8 | 207.4 | 52.0 | 81.1 | own collection 2014                |
| <i>Vaccinium vitis-idaea</i>    | 9.2  | 11.3 | 39.1 | 433.3 | 8.5  | 33.3 | own collection 2014                |
| <i>Veronica alpina</i>          | 7.3  | 15.5 | 26.7 | 436.2 | 3.3  | 41.0 | own collection 2014                |
| <i>Viola biflora</i>            | 6.8  | 36.7 | 13.8 | 178.9 | 1.0  | 11.7 | own collection 2014                |

## Supplementary References

1. Garnier, E. *et al.* Assessing the effects of land-use change on plant traits, communities and ecosystem functioning in grasslands: a standardized methodology and lessons from an application to 11 european sites. *Ann. Bot.* **99**, 967–985 (2007).
2. Fitter, A. H. & Peat, H. J. The Ecological Flora Database. *J. Ecol.* **82**, 415–425 (1994).
3. Pierce, S., Luzzaro, A., Caccianiga, M., Ceriani, R. M. & Cerabolini, B. Disturbance is the principal  $\alpha$ -scale filter determining niche differentiation, coexistence and biodiversity in an alpine community. *J. Ecol.* **95**, 698–706 (2007).
4. Spasojevic, M. J. & Suding, K. N. Inferring community assembly mechanisms from functional diversity patterns: the importance of multiple assembly processes. *J. Ecol.* **100**, 652–661 (2012).
